# Supplementary material for: Interleukin (IL)-1 promotes allogeneic T cell intimal infiltration and IL-17 production in a model of human artery rejection
Source: PubMed Central journal article supplement — J Exp Med. 2008 Dec 22;205(13):3145–58. doi: 10.1084/jem.20081661 (PMC2605225; doi:10.1084/jem.20081661), 2008-12-22
Supplement: jem.20081661_1.pdf [file jem.20081661_1.pdf]

SUPPLEMENTAL MATERIAL

Rao et al., <http://www.jem.org/cgi/content/full/jem.20081661/DC1>

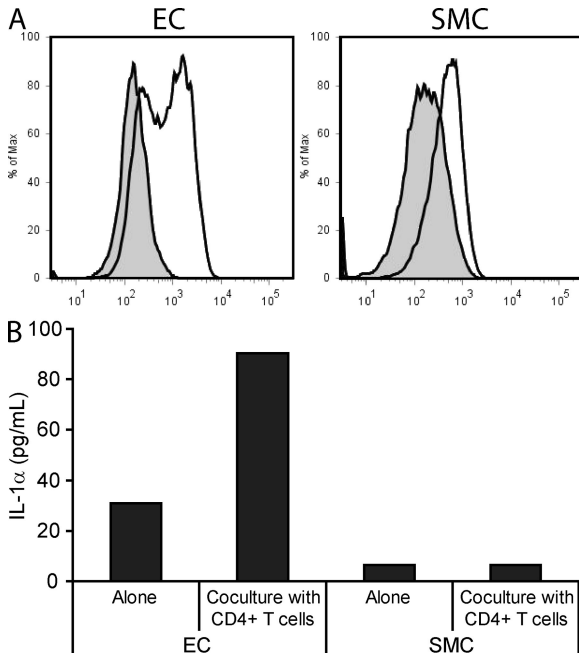

**Figure S1. Induction of IL-1 $\alpha$  by co-culture with allogeneic T cells.** ECs and SMCs were pretreated for 3 d with 50 ng/ml IFN- $\gamma$  to induce MHC class II expression, washed thoroughly, and co-cultured with allogeneic CD4<sup>+</sup> T cells. (A) MHC class II expression (continuous line) was confirmed on ECs and SMCs by flow cytometry before co-culture with T cells. Shaded histograms represent staining with an isotype control antibody. (B) After 3 d of co-culture with allogeneic CD4<sup>+</sup> T cells, ECs and SMCs were purified and IL-1 $\alpha$  was measured by ELISA as in Fig. 1 B. Representative data from one experiment are shown. Similar results were obtained with three EC and two SMC donors.

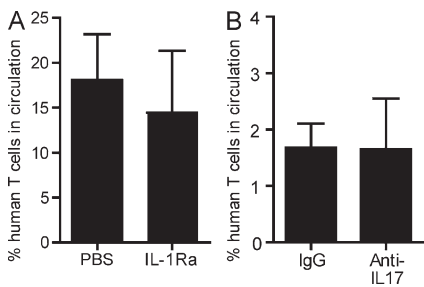

**Figure S2. Effects of IL-1Ra and anti-IL-17 antibody on adoptive transfer of human T cells.** Quantification of the percentage of human CD3<sup>+</sup> T cells among the total leukocytes in the circulation of mice treated with (A) IL-1Ra or PBS, as in Fig. 2, or (B) an anti-IL-17 neutralizing antibody or isotype control, as in Fig. 6. The percentages represent human CD3<sup>+</sup> cells/(mouse CD45<sup>+</sup> cells + human CD3<sup>+</sup> cells). Means  $\pm$  SEM are shown (A:  $n = 10$  per group; B: IgG,  $n = 6$  and anti-IL-17,  $n = 5$  per group).

**Table S1.** Microarray analysis of IL-17-responses in human SMCs

| Fold change | Untreated | IL-17-treated | GenBank number | Probe ID     | Gene symbol | Gene title                                                                     |
|-------------|-----------|---------------|----------------|--------------|-------------|--------------------------------------------------------------------------------|
| 20.80       | 87        | 1,812         | NM_000641      | 206924_at    | IL11        | interleukin 11                                                                 |
| 15.29       | 25        | 382           | S77154         | 216248_s_at  | NR4A2       | nuclear receptor subfamily 4, group A, member 2                                |
| 13.90       | 53        | 740           | AW235671       | 230380_at    | THAP2       | THAP domain containing, apoptosis associated protein 2                         |
| 12.26       | 34        | 411           | AI935096       | 204621_s_at  | NR4A2       | nuclear receptor subfamily 4, group A, member 2                                |
| 11.70       | 60        | 705           | NM_001523      | 207316_at    | HAS1        | hyaluronan synthase 1                                                          |
| 11.29       | 37        | 413           | NM_006981      | 207978_s_at  | NR4A3       | nuclear receptor subfamily 4, group A, member 3                                |
| 10.83       | 39        | 426           | NM_006186      | 204622_x_at  | NR4A2       | nuclear receptor subfamily 4, group A, member 2                                |
| 7.99        | 106       | 847           | U12767         | 209959_at    | NR4A3       | nuclear receptor subfamily 4, group A, member 3                                |
| 6.40        | 400       | 2,561         | AY151286       | 1554997_a_at | PTGS2       | prostaglandin-endoperoxide synthase 2                                          |
| 5.96        | 197       | 1,176         | NM_001945      | 203821_at    | HBEGF       | heparin-binding EGF-like growth factor                                         |
| 5.94        | 32        | 190           | NM_001657      | 205239_at    | AREG        | amphiregulin (schwannoma-derived growth factor)                                |
| 5.48        | 268       | 1,472         | NM_004591      | 205476_at    | CCL20       | chemokine (C-C motif) ligand 20                                                |
| 4.90        | 119       | 584           | NM_002090      | 207850_at    | CXCL3       | chemokine (C-X-C motif) ligand 3                                               |
| 4.51        | 155       | 698           | AI038059       | 231240_at    | DIO2        | deiodinase, iodothyronine, type II                                             |
| 4.43        | 96        | 424           | NM_001200      | 205290_s_at  | BMP2        | bone morphogenetic protein 2                                                   |
| 4.41        | 108       | 475           | AA876372       | 225516_at    | SLC7A2      | solute carrier family 7 (cationic amino acid transporter, y+ system), member 2 |
| 4.35        | 1,164     | 5,062         | NM_000963      | 204748_at    | PTGS2       | prostaglandin-endoperoxide synthase 2                                          |
| 4.30        | 244       | 1,049         | BE856336       | 226614_s_at  | C8orf13     | chromosome 8 open reading frame 13                                             |
| 4.27        | 108       | 463           | NM_000710      | 207510_at    | BDKRB1      | bradykinin receptor B1                                                         |
| 4.05        | 153       | 622           | NM_002309      | 205266_at    | LIF         | leukemia inhibitory factor (cholinergic differentiation factor)                |
| 4.03        | 95        | 383           | AF314090       | 210689_at    | CLDN14      | claudin 14                                                                     |
| 3.97        | 90        | 356           | M60278         | 38037_at     | HBEGF       | heparin-binding EGF-like growth factor                                         |
| 3.93        | 108       | 422           | R40917         | 204491_at    | PDE4D       | Phosphodiesterase 4D, cAMP-specific                                            |
| 3.92        | 142       | 559           | AA583044       | 205289_at    | BMP2        | bone morphogenetic protein 2                                                   |
| 3.57        | 189       | 674           | M57765         | 206926_s_at  | IL11        | interleukin 11                                                                 |
| 3.54        | 39        | 137           | AA446953       | 241749_at    | LOC347273   | similar to RIKEN cDNA 2310039E09                                               |
| 3.44        | 32        | 109           | AA010315       | 230778_at    | ---         | Transcribed locus                                                              |
| 3.39        | 128       | 433           | NM_003483      | 208025_s_at  | HMGGA2      | high mobility group AT-hook 2 /// high mobility group AT-hook 2                |
| 3.34        | 987       | 3,300         | AF043337       | 211506_s_at  | IL8         | interleukin 8                                                                  |
| 3.32        | 51        | 171           | BC012486       | 1555673_at   | KRTAP2-1    | keratin associated protein 2-1                                                 |
| 3.27        | 111       | 362           | AV707102       | 225207_at    | PK4         | pyruvate dehydrogenase kinase, isozyme 4                                       |
| 3.26        | 294       | 957           | NM_021972      | 219257_s_at  | SPHK1       | sphingosine kinase 1                                                           |
| 3.24        | 207       | 670           | AI633559       | 238623_at    | ---         | CDNA FLJ37310 fis, clone BRAMY2016706                                          |
| 3.24        | 175       | 569           | AI418293       | 238462_at    | STS-1       | Cbl-interacting protein Sts-1                                                  |
| 3.17        | 180       | 571           | AB037784       | 225847_at    | AADACL1     | arylacamide deacetylase-like 1                                                 |
| 3.17        | 138       | 437           | AI927919       | 238587_at    | STS-1       | Cbl-interacting protein Sts-1                                                  |
| 3.06        | 116       | 354           | AI341146       | 228033_at    | E2F7        | E2F transcription factor 7                                                     |
| 2.92        | 89        | 261           | U16996         | 209457_at    | DUSP5       | dual specificity phosphatase 5                                                 |
| 2.91        | 391       | 1,138         | N32557         | 226907_at    | PPP1R14C    | protein phosphatase 1, regulatory (inhibitor) subunit 14C                      |
| 2.90        | 79        | 229           | AI382146       | 202935_s_at  | SOX9        | SRY (sex determining region Y)-box 9                                           |
| 2.87        | 492       | 1,410         | NM_014226      | 205130_at    | RAGE        | renal tumor antigen                                                            |
| 2.83        | 511       | 1,447         | NM_002923      | 202388_at    | RGS2        | regulator of G-protein signalling 2, 24kDa                                     |
| 2.82        | 132       | 371           | NM_003326      | 207426_s_at  | TNFSF4      | tumor necrosis factor (ligand) superfamily, member 4                           |
| 2.81        | 184       | 517           | BF111626       | 228559_at    | C16orf60    | Chromosome 16 open reading frame 60                                            |
| 2.79        | 224       | 625           | AA780381       | 215498_s_at  | MAP2K3      | mitogen-activated protein kinase kinase 3                                      |
| 2.76        | 1,270     | 3,511         | NM_000600      | 205207_at    | IL6         | interleukin 6 (interferon, beta 2)                                             |
| 2.73        | 988       | 2,700         | M27968         | 204421_s_at  | FGF2        | fibroblast growth factor 2 (basic)                                             |
| 2.73        | 47        | 129           | AA669114       | 239835_at    | KBTBD8      | kelch repeat and BTB (POZ) domain containing 8                                 |
| 2.73        | 1,856     | 5,057         | NM_002575      | 204614_at    | SERPINB2    | serpin peptidase inhibitor, clade B (ovalbumin), member 2                      |
| 2.70        | 281       | 757           | AA425726       | 225582_at    | KIAA1754    | KIAA1754                                                                       |

|      |       |       |           |             |           |                                                                                   |
|------|-------|-------|-----------|-------------|-----------|-----------------------------------------------------------------------------------|
| 2.68 | 74    | 199   | NM_005491 | 205088_at   | CXorf6    | chromosome X open reading frame 6                                                 |
| 2.68 | 112   | 300   | NM_006273 | 208075_s_at | CCL7      | chemokine (C-C motif) ligand 7 /// chemokine (C-C motif) ligand 7                 |
| 2.68 | 54    | 145   | AK096850  | 1562367_at  | FLJ39531  | FLJ39531 protein                                                                  |
| 2.65 | 77    | 205   | AL518391  | 209047_at   | AQP1      | aquaporin 1 (Colton blood group)                                                  |
| 2.64 | 743   | 1,962 | NM_000270 | 201695_s_at | NP        | nucleoside phosphorylase                                                          |
| 2.63 | 51    | 133   | U53506    | 203699_s_at | DIO2      | deiodinase, iodothyronine, type II                                                |
| 2.63 | 400   | 1,052 | AF269167  | 221685_s_at | CCDC99    | coiled-coil domain containing 99                                                  |
| 2.62 | 189   | 494   | NM_030775 | 221029_s_at | WNT5B     | wingless-type MMTV integration site family, member 5B                             |
| 2.61 | 1,206 | 3,152 | M15330    | 39402_at    | IL1B      | interleukin 1, beta                                                               |
| 2.61 | 255   | 666   | NM_001444 | 202345_s_at | FABP5     | fatty acid binding protein 5 (psoriasis-associated)                               |
| 2.59 | 89    | 230   | AU144912  | 209540_at   | IGF1      | insulin-like growth factor 1 (somatomedin C)                                      |
| 2.57 | 1,647 | 4,229 | NM_000576 | 205067_at   | IL1B      | interleukin 1, beta                                                               |
| 2.54 | 498   | 1,265 | NM_021013 | 206969_at   | KRTHA4    | keratin, hair, acidic, 4                                                          |
| 2.54 | 653   | 1,656 | AA780381  | 215499_at   | LOC651423 | similar to mitogen-activated protein kinase kinase 3 isoform A                    |
| 2.53 | 83    | 209   | U65590    | 212657_s_at | IL1RN     | interleukin 1 receptor antagonist                                                 |
| 2.51 | 2,095 | 5,267 | NM_001069 | 204141_at   | TUBB2A    | tubulin, beta 2A                                                                  |
| 2.51 | 63    | 159   | NM_000167 | 207387_s_at | GK        | glycerol kinase                                                                   |
| 2.51 | 2,180 | 5,468 | NM_000584 | 202859_x_at | IL8       | interleukin 8                                                                     |
| 2.45 | 84    | 206   | NM_002185 | 205798_at   | IL7R      | interleukin 7 receptor /// interleukin 7 receptor                                 |
| 2.44 | 251   | 613   | AB037820  | 230112_at   | ---       | membrane-associated ring finger (C3HC4) 4                                         |
| 2.43 | 674   | 1,640 | BE646573  | 223217_s_at | NFKBIZ    | nuclear factor of kappa light polypeptide gene enhancer in B-cells inhibitor,zeta |
| 2.42 | 1,418 | 3,434 | AL021977  | 36711_at    | MAFF      | v-maf musculoaponeurotic fibrosarcoma oncogene homolog F (avian)                  |
| 2.42 | 291   | 705   | NM_012323 | 205193_at   | MAFF      | v-maf musculoaponeurotic fibrosarcoma oncogene homolog F (avian)                  |
| 2.42 | 132   | 319   | NM_013989 | 203700_s_at | DIO2      | deiodinase, iodothyronine, type II                                                |
| 2.40 | 201   | 482   | AF169312  | 223333_s_at | ANGPTL4   | angiopoietin-like 4                                                               |
| 2.40 | 102   | 244   | U41815    | 210793_s_at | NUP98     | nucleoporin 98kDa                                                                 |
| 2.40 | 154   | 370   | AI972496  | 209541_at   | IGF1      | insulin-like growth factor 1 (somatomedin C)                                      |
| 2.39 | 106   | 254   | AW450874  | 227613_at   | ZNF331    | zinc finger protein 331                                                           |
| 2.37 | 396   | 940   | AF001294  | 209803_s_at | PHLDA2    | pleckstrin homology-like domain, family A, member 2                               |
| 2.37 | 471   | 1,114 | AL035541  | 222449_at   | TMEPAI    | transmembrane, prostate androgen induced RNA                                      |
| 2.37 | 1,451 | 3,434 | NM_002006 | 204422_s_at | FGF2      | fibroblast growth factor 2 (basic)                                                |
| 2.36 | 74    | 176   | AI830490  | 214681_at   | GK        | glycerol kinase                                                                   |
| 2.35 | 119   | 279   | NM_000346 | 202936_s_at | SOX9      | SRY (sex determining region Y)-box 9                                              |
| 2.34 | 218   | 510   | BE465475  | 229310_at   | KBTBD9    | kelch repeat and BTB (POZ) domain containing 9                                    |
| 2.34 | 140   | 328   | NM_016569 | 219682_s_at | TBX3      | T-box 3 (ulnar mammary syndrome)                                                  |
| 2.31 | 221   | 510   | AF064238  | 209427_at   | SMTN      | smoothelin                                                                        |
| 2.29 | 210   | 481   | NM_018555 | 219228_at   | ZNF331    | zinc finger protein 331                                                           |
| 2.28 | 184   | 419   | BF878343  | 235204_at   | COX15     | COX15 homolog, cytochrome c oxidase assembly protein (yeast)                      |
| 2.28 | 158   | 361   | AL136861  | 221541_at   | CRISPLD2  | cysteine-rich secretory protein LCCL domain containing 2                          |
| 2.28 | 213   | 486   | AI949549  | 227948_at   | FGD4      | FYVE, RhoGEF and PH domain containing 4                                           |
| 2.27 | 46    | 104   | AK023669  | 222118_at   | C16orf60  | chromosome 16 open reading frame 60                                               |
| 2.27 | 73    | 165   | AA037664  | 228359_at   | STS-1     | Cbl-interacting protein Sts-1                                                     |
| 2.26 | 744   | 1,681 | NM_005328 | 206432_at   | HAS2      | hyaluronan synthase 2                                                             |
| 2.24 | 214   | 480   | AI805006  | 229055_at   | GPR68     | G protein-coupled receptor 68                                                     |
| 2.23 | 118   | 263   | NM_004973 | 203298_s_at | JARID2    | Jumonji, AT rich interactive domain 2                                             |
| 2.23 | 128   | 284   | AI991459  | 235236_at   | DOCK2     | Dedicator of cytokinesis 2                                                        |
| 2.22 | 420   | 933   | NM_000597 | 202718_at   | IGFBP2    | insulin-like growth factor binding protein 2, 36kDa                               |
| 2.21 | 194   | 428   | NM_006932 | 207390_s_at | SMTN      | smoothelin                                                                        |
| 2.20 | 407   | 897   | AA736452  | 229553_at   | PGM2L1    | phosphoglucomutase 2-like 1                                                       |
| 2.20 | 1,137 | 2,505 | AB018009  | 201195_s_at | SLC7A5    | solute carrier family 7 (cationic amino acid transporter, y+ system), member 5    |
| 2.20 | 56    | 123   | AI015547  | 244499_at   | PSRC2     | proline/serine-rich coiled-coil 2                                                 |
| 2.20 | 71    | 156   | NM_013959 | 206343_s_at | NRG1      | neuregulin 1                                                                      |

|       |       |       |           |             |              |                                                                                    |
|-------|-------|-------|-----------|-------------|--------------|------------------------------------------------------------------------------------|
| 2.19  | 572   | 1,253 | AB046813  | 225989_at   | HERC4        | hect domain and RLD 4                                                              |
| 2.19  | 58    | 127   | AI939474  | 237817_at   | SSR3         | Signal sequence receptor, gamma (translocon-associated protein gamma)              |
| 2.19  | 86    | 189   | NM_002595 | 206474_at   | PCK2         | PCTAIRE protein kinase 2                                                           |
| 2.19  | 359   | 786   | AV701177  | 225283_at   | ARRDC4       | arrestin domain containing 4                                                       |
| 2.19  | 2,177 | 4,759 | BC004188  | 208977_x_at | TUBB2C       | tubulin, beta 2C                                                                   |
| 2.18  | 161   | 351   | NM_020354 | 220153_at   | ENTPD7       | ectonucleoside triphosphate diphosphohydrolase 7                                   |
| 2.18  | 183   | 399   | AA128023  | 213103_at   | STARD13      | START domain containing 13                                                         |
| 2.18  | 212   | 462   | NM_006577 | 219326_s_at | B3GNT2       | UDP-GlcNAc:betaGal beta-1,3-N-acetylglucosaminyltransferase 2                      |
| 2.17  | 1,032 | 2,240 | NM_001511 | 204470_at   | CXCL1        | chemokine (C-X-C motif) ligand 1 (melanoma growth stimulating activity, alpha)     |
| 2.16  | 168   | 364   | AK021780  | 212722_s_at | PTDSR        | phosphatidyserine receptor                                                         |
| 2.16  | 600   | 1,296 | AI693140  | 213725_x_at | LOC283824    | hypothetical protein LOC283824                                                     |
| 2.16  | 803   | 1,734 | AI374739  | 230372_at   | ---          | Transcribed locus, strongly similar to XP_528222.1                                 |
| 2.16  | 605   | 1,304 | NM_006392 | 200875_s_at | NOL5A        | nucleolar protein 5A (56kDa with KKE/D repeat)                                     |
| 2.15  | 207   | 445   | BC005259  | 210813_s_at | XRCC4        | X-ray repair complementing defective repair in Chinese hamster cells 4             |
| 2.15  | 805   | 1,730 | AI263909  | 212099_at   | RHOB         | ras homolog gene family, member B                                                  |
| 2.15  | 2,077 | 4,465 | AA515698  | 213726_x_at | TUBB2C       | tubulin, beta 2C                                                                   |
| 2.14  | 118   | 253   | AV704132  | 224828_at   | CPEB4        | cytoplasmic polyadenylation element binding protein 4                              |
| 2.14  | 316   | 676   | AA293502  | 218177_at   | CHMP1B       | chromatin modifying protein 1B                                                     |
| 2.14  | 280   | 599   | AB017445  | 205071_x_at | XRCC4        | X-ray repair complementing defective repair in Chinese hamster cells 4             |
| 2.14  | 315   | 673   | AF288208  | 222870_s_at | B3GNT2       | UDP-GlcNAc:betaGal beta-1,3-N-acetylglucosaminyltransferase 2                      |
| 2.13  | 277   | 592   | NM_001905 | 202613_at   | CTPS         | CTP synthase                                                                       |
| 2.13  | 427   | 911   | BF971587  | 209372_x_at | TUBB2A /// B | tubulin, beta 2A /// tubulin, beta 2B                                              |
| 2.13  | 889   | 1,895 | BG292233  | 201626_at   | INSIG1       | insulin induced gene 1                                                             |
| 2.12  | 528   | 1,119 | NM_005542 | 201627_s_at | INSIG1       | insulin induced gene 1                                                             |
| 2.12  | 204   | 432   | AI968085  | 213425_at   | WNT5A        | wingless-type MMTV integration site family, member 5A                              |
| 2.11  | 464   | 980   | NM_007026 | 203367_at   | DUSP14       | dual specificity phosphatase 14                                                    |
| 2.10  | 188   | 395   | NM_000161 | 204224_s_at | GCH1         | GTP cyclohydrolase 1 (dopa-responsive dystonia)                                    |
| 2.10  | 269   | 564   | AI703321  | 231227_at   | ---          | Transcribed locus, strongly similar to NP_003383.2                                 |
| 2.10  | 1,128 | 2,364 | NM_012334 | 201976_s_at | MYO10        | myosin X                                                                           |
| 2.08  | 82    | 172   | AA196325  | 221994_at   | PDLIM5       | PDZ and LIM domain 5                                                               |
| 2.08  | 986   | 2,053 | NM_006086 | 202154_x_at | TUBB3        | tubulin, beta 3                                                                    |
| 2.08  | 1,125 | 2,339 | AB037925  | 223218_s_at | NFKBIZ       | nuclear factor of kappa light polypeptide gene enhancer in B-cells inhibitor, zeta |
| 2.08  | 312   | 648   | AV724329  | 229256_at   | PGM2L1       | phosphoglucomutase 2-like 1                                                        |
| 2.07  | 236   | 489   | AI735586  | 229485_x_at | LOC152573    | hypothetical protein BC012029                                                      |
| 2.07  | 2,229 | 4,608 | AL565749  | 213476_x_at | TUBB3        | tubulin, beta 3                                                                    |
| 2.06  | 473   | 974   | BG231691  | 226206_at   | MAFK         | v-maf musculoaponeurotic fibrosarcoma oncogene homolog K (avian)                   |
| 2.05  | 128   | 263   | AF069506  | 223467_at   | RASD1        | RAS, dexamethasone-induced 1                                                       |
| 2.04  | 512   | 1042  | AL035541  | 222450_at   | TMEPAI       | transmembrane, prostate androgen induced RNA                                       |
| 2.03  | 310   | 631   | NM_007147 | 205497_at   | ZNF175       | zinc finger protein 175                                                            |
| 2.02  | 1,999 | 4,038 | NM_005627 | 201739_at   | SGK          | serum/glucocorticoid regulated kinase                                              |
| 2.02  | 83    | 167   | BF590917  | 244025_at   | ---          | ---                                                                                |
| 2.02  | 261   | 527   | BG029530  | 203297_s_at | JARID2       | Jumonji, AT rich interactive domain 2                                              |
| 2.02  | 214   | 431   | NM_013246 | 219500_at   | CLCF1        | cardiotrophin-like cytokine factor 1                                               |
| 2.01  | 214   | 430   | BC001373  | 223264_at   | MESDC1       | mesoderm development candidate 1                                                   |
| -2.00 | 122   | 61    | NM_018940 | 231738_at   | PCDHB7       | protocadherin beta 7                                                               |
| -2.00 | 2,250 | 1,124 | NM_022748 | 217853_at   | TNS3         | tensin 3                                                                           |
| -2.01 | 433   | 215   | AL565238  | 225956_at   | LOC153222    | adult retina protein                                                               |
| -2.01 | 338   | 168   | T54159    | 213820_s_at | STARD5       | START domain containing 5                                                          |
| -2.01 | 1,397 | 695   | NM_005261 | 204472_at   | GEM          | GTP binding protein overexpressed in skeletal muscle                               |
| -2.02 | 636   | 315   | U50748    | 209894_at   | LEPR         | leptin receptor                                                                    |
| -2.02 | 198   | 98    | AL589603  | 225894_at   | SYNPO2       | synaptopodin 2                                                                     |
| -2.03 | 1,183 | 584   | BF001670  | 202668_at   | EFNB2        | ephrin-B2                                                                          |

|       |       |       |           |             |           |                                                                          |
|-------|-------|-------|-----------|-------------|-----------|--------------------------------------------------------------------------|
| -2.03 | 1,397 | 687   | BE883841  | 225123_at   | ---       | MRNA; cDNA DKFZp313B1017 (from clone DKFZp313B1017)                      |
| -2.04 | 3,417 | 1,675 | AI355441  | 225239_at   | ---       | CDNA FLJ26120 fis, clone SYN00419                                        |
| -2.05 | 387   | 189   | AL353944  | 232231_at   | RUNX2     | runt-related transcription factor 2                                      |
| -2.06 | 431   | 210   | N24643    | 201294_s_at | WSB1      | WD repeat and SOCS box-containing 1                                      |
| -2.06 | 601   | 291   | NM_006895 | 204112_s_at | HNMT      | histamine N-methyltransferase                                            |
| -2.07 | 244   | 118   | AI089319  | 238206_at   | ---       | Transcribed locus, strongly similar to NP_067647.1                       |
| -2.07 | 105   | 51    | BC003614  | 211214_s_at | DAPK1     | death-associated protein kinase 1                                        |
| -2.08 | 177   | 85    | NM_001393 | 206101_at   | ECM2      | extracellular matrix protein 2, female organ and adipocyte specific      |
| -2.09 | 122   | 58    | NM_021977 | 205421_at   | SLC22A3   | solute carrier family 22 (extraneuronal monoamine transporter), member 3 |
| -2.10 | 379   | 180   | BE910600  | 217599_s_at | MDFIC     | MyoD family inhibitor domain containing                                  |
| -2.10 | 156   | 74    | AI088609  | 229947_at   | PI15      | peptidase inhibitor 15                                                   |
| -2.11 | 105   | 50    | AJ276230  | 215723_s_at | PLD1      | phospholipase D1, phosphatidylcholine-specific                           |
| -2.11 | 363   | 172   | NM_000609 | 203666_at   | CXCL12    | chemokine (C-X-C motif) ligand 12 (stromal cell-derived factor 1)        |
| -2.12 | 103   | 49    | M17863    | 210881_s_at | IGF2      | insulin-like growth factor 2 (somatomedin A)                             |
| -2.13 | 189   | 89    | NM_004619 | 204352_at   | TRAF5     | TNF receptor-associated factor 5                                         |
| -2.13 | 122   | 57    | NM_004734 | 205399_at   | DCAMK1    | doublecortin and CaM kinase-like 1                                       |
| -2.14 | 730   | 342   | AW450363  | 202206_at   | ARL4C     | ADP-ribosylation factor-like 4C                                          |
| -2.14 | 309   | 144   | AB037810  | 225056_at   | SIPA1L2   | signal-induced proliferation-associated 1 like 2                         |
| -2.15 | 354   | 165   | NM_000201 | 202638_s_at | ICAM1     | intercellular adhesion molecule 1 (CD54), human rhinovirus receptor      |
| -2.15 | 278   | 129   | AI002715  | 222379_at   | ---       | Transcribed locus, strongly similar to NP_542402.1                       |
| -2.15 | 136   | 63    | AI244908  | 227697_at   | SOCS3     | suppressor of cytokine signaling 3                                       |
| -2.15 | 492   | 228   | NM_003641 | 201601_x_at | IFITM1    | interferon induced transmembrane protein 1 (9-27)                        |
| -2.16 | 172   | 79    | NM_000612 | 202410_x_at | IGF2      | insulin-like growth factor 2 (somatomedin A)                             |
| -2.17 | 118   | 54    | AI811298  | 213568_at   | OSR2      | odd-skipped related 2 (Drosophila)                                       |
| -2.17 | 105   | 48    | AW237741  | 229114_at   | ---       | CDNA clone IMAGE:4801326                                                 |
| -2.19 | 376   | 172   | BF685808  | 235683_at   | SESN3     | sestrin 3                                                                |
| -2.21 | 439   | 199   | AA809487  | 231042_s_at | ---       | Transcribed locus                                                        |
| -2.21 | 142   | 64    | NM_080671 | 1552507_at  | KCNE4     | potassium voltage-gated channel, Isk-related family, member 4            |
| -2.22 | 243   | 110   | NM_021255 | 219132_at   | PELI2     | pellino homolog 2 (Drosophila)                                           |
| -2.22 | 499   | 225   | AW511222  | 241879_at   | ---       | Transcribed locus, moderately similar to XP_517655.1                     |
| -2.22 | 197   | 89    | BE673587  | 229151_at   | SLC14A1   | Solute carrier family 14 (urea transporter), member 1 (Kidd blood group) |
| -2.22 | 747   | 336   | N21643    | 225328_at   | ---       | CDNA FLJ39585 fis, clone SKMUS2006633                                    |
| -2.22 | 140   | 63    | AI498395  | 239262_at   | PRSS23    | Protease, serine, 23                                                     |
| -2.23 | 165   | 74    | NM_080671 | 1552508_at  | KCNE4     | potassium voltage-gated channel, Isk-related family, member 4            |
| -2.24 | 306   | 137   | NM_015865 | 205856_at   | SLC14A1   | solute carrier family 14 (urea transporter), member 1 (Kidd blood group) |
| -2.24 | 158   | 71    | NM_025151 | 219681_s_at | RAB11FIP1 | RAB11 family interacting protein 1 (class I)                             |
| -2.25 | 1,563 | 695   | AF208043  | 208966_x_at | IFI16     | interferon, gamma-inducible protein 16                                   |
| -2.25 | 328   | 146   | AA528140  | 228057_at   | DDIT4L    | DNA-damage-inducible transcript 4-like                                   |
| -2.26 | 512   | 227   | AL136778  | 223627_at   | RKHD3     | ring finger and KH domain containing 3                                   |
| -2.26 | 230   | 102   | AI805323  | 231804_at   | RXFP1     | relaxin/insulin-like family peptide receptor 1                           |
| -2.26 | 144   | 64    | NM_004572 | 207717_s_at | PKP2      | plakophilin 2                                                            |
| -2.26 | 158   | 70    | AU146709  | 230660_at   | SERTAD4   | SERTA domain containing 4                                                |
| -2.27 | 2,372 | 1,046 | AU155361  | 227062_at   | TncRNA    | trophoblast-derived noncoding RNA                                        |
| -2.27 | 1,508 | 663   | U19495    | 209687_at   | CXCL12    | chemokine (C-X-C motif) ligand 12 (stromal cell-derived factor 1)        |
| -2.28 | 289   | 127   | AF316824  | 224396_s_at | ASPN      | asporin (LRR class 1) /// asporin (LRR class 1)                          |
| -2.29 | 1,051 | 458   | AL136653  | 209183_s_at | C10orf10  | chromosome 10 open reading frame 10                                      |
| -2.30 | 814   | 353   | NM_019555 | 218501_at   | ARHGEF3   | Rho guanine nucleotide exchange factor (GEF) 3                           |
| -2.31 | 332   | 144   | R72286    | 212713_at   | MFAP4     | microfibrillar-associated protein 4                                      |
| -2.31 | 102   | 44    | AL575306  | 224997_x_at | H19       | H19, imprinted maternally expressed untranslated mRNA                    |
| -2.31 | 873   | 377   | AW188464  | 230083_at   | ---       | Full length insert cDNA clone Y148C03                                    |
| -2.31 | 1,873 | 809   | NM_005531 | 206332_s_at | IFI16     | interferon, gamma-inducible protein 16                                   |
| -2.32 | 494   | 213   | L37882    | 210220_at   | FZD2      | frizzled homolog 2 (Drosophila)                                          |

|       |       |       |           |              |           |                                                                           |
|-------|-------|-------|-----------|--------------|-----------|---------------------------------------------------------------------------|
| -2.34 | 3,324 | 1,423 | NM_001124 | 202912_at    | ADM       | adrenomedullin                                                            |
| -2.34 | 4,672 | 1,999 | NM_000900 | 202291_s_at  | MGP       | matrix Gla protein                                                        |
| -2.34 | 684   | 292   | BC001051  | 202208_s_at  | ARL4C     | ADP-ribosylation factor-like 4C                                           |
| -2.36 | 337   | 143   | NM_030781 | 221019_s_at  | COLEC12   | collectin sub-family member 12 /// collectin sub-family member 12         |
| -2.37 | 310   | 131   | NM_021634 | 1552715_a_at | RXFP1     | relaxin/insulin-like family peptide receptor 1                            |
| -2.38 | 1,230 | 517   | BG435404  | 202207_at    | ARL4C     | ADP-ribosylation factor-like 4C                                           |
| -2.38 | 173   | 73    | AW269818  | 222908_at    | FAM38B    | family with sequence similarity 38, member B                              |
| -2.39 | 263   | 110   | W60806    | 222662_at    | LOC286044 | hypothetical protein LOC286044                                            |
| -2.41 | 794   | 330   | NM_000591 | 201743_at    | CD14      | CD14 molecule /// CD14 molecule                                           |
| -2.42 | 787   | 325   | BG150485  | 228754_at    | SLC6A6    | solute carrier family 6 (neurotransmitter transporter, taurine), member 6 |
| -2.42 | 726   | 300   | AW264204  | 228335_at    | CLDN11    | claudin 11 (oligodendrocyte transmembrane protein)                        |
| -2.45 | 221   | 90    | NM_014862 | 202986_at    | ARNT2     | aryl-hydrocarbon receptor nuclear translocator 2                          |
| -2.45 | 383   | 156   | NM_022469 | 220794_at    | GREM2     | gremlin 2, cysteine knot superfamily, homolog (Xenopus laevis)            |
| -2.46 | 132   | 54    | BC022479  | 1554378_a_at | PDE1C     | phosphodiesterase 1C, calmodulin-dependent 70kDa                          |
| -2.47 | 140   | 57    | AW080835  | 227285_at    | C1orf51   | chromosome 1 open reading frame 51                                        |
| -2.48 | 208   | 84    | AW952781  | 235174_s_at  | LOC641917 | hypothetical protein LOC641917 /// hypothetical protein LOC644271         |
| -2.48 | 283   | 114   | AI761621  | 225768_at    | NR1D2     | nuclear receptor subfamily 1, group D, member 2                           |
| -2.49 | 455   | 183   | AW376955  | 235150_at    | ---       | MRNA; cDNA DKFZp313B1017 (from clone DKFZp313B1017)                       |
| -2.50 | 685   | 274   | AA749101  | 214022_s_at  | IFITM1    | interferon induced transmembrane protein 1 (9-27)                         |
| -2.52 | 188   | 74    | NM_014210 | 204774_at    | EVI2A     | ecotropic viral integration site 2A                                       |
| -2.55 | 111   | 43    | AF142573  | 223475_at    | CRISPLD1  | cysteine-rich secretory protein LCCL domain containing 1                  |
| -2.56 | 158   | 62    | AW731710  | 228697_at    | ---       | ---                                                                       |
| -2.58 | 248   | 96    | BF111821  | 201295_s_at  | WSB1      | WD repeat and SOCS box-containing 1                                       |
| -2.60 | 445   | 171   | BG434174  | 213413_at    | STON1     | stonin 1                                                                  |
| -2.61 | 1,304 | 500   | AV659198  | 238320_at    | TncRNA    | trophoblast-derived noncoding RNA                                         |
| -2.62 | 126   | 48    | AV724325  | 238673_at    | ---       | Transcribed locus                                                         |
| -2.63 | 1,214 | 461   | NM_014890 | 204135_at    | DOC1      | downregulated in ovarian cancer 1                                         |
| -2.65 | 723   | 272   | BG256677  | 208965_s_at  | IFI16     | interferon, gamma-inducible protein 16                                    |
| -2.70 | 673   | 250   | NM_017680 | 219087_at    | ASPN      | asporin (LRR class 1)                                                     |
| -2.75 | 163   | 60    | N78412    | 242899_at    | ---       | MRNA; cDNA DKFZp313B1017 (from clone DKFZp313B1017)                       |
| -2.75 | 971   | 353   | AF329092  | 1554966_a_at | DOC1      | downregulated in ovarian cancer 1                                         |
| -2.82 | 196   | 69    | NM_002705 | 203407_at    | PPL       | periplakin                                                                |
| -2.91 | 554   | 190   | NM_004657 | 218711_s_at  | SDPR      | serum deprivation response (phosphatidylserine binding protein)           |
| -2.95 | 722   | 244   | BF982174  | 222717_at    | SDPR      | serum deprivation response (phosphatidylserine binding protein)           |
| -2.98 | 142   | 48    | AI758223  | 228268_at    | FMO2      | flavin containing monooxygenase 2                                         |
| -3.00 | 188   | 63    | BC020718  | 1555564_a_at | CFI       | complement factor I                                                       |
| -3.03 | 189   | 62    | NM_000204 | 203854_at    | CFI       | complement factor I                                                       |
| -3.04 | 335   | 110   | AF225513  | 223551_at    | PKIB      | protein kinase (cAMP-dependent, catalytic) inhibitor beta                 |
| -3.05 | 198   | 65    | M24317    | 209612_s_at  | ADH1B     | alcohol dehydrogenase IB (class I), beta polypeptide                      |
| -3.06 | 209   | 68    | AI765006  | 235775_at    | TMTC2     | transmembrane and tetratricopeptide repeat containing 2                   |
| -3.09 | 809   | 261   | NM_004938 | 203139_at    | DAPK1     | death-associated protein kinase 1                                         |
| -3.10 | 412   | 133   | BC000069  | 209496_at    | RARRES2   | retinoic acid receptor responder (tazarotene induced) 2                   |
| -3.11 | 455   | 146   | N32859    | 209750_at    | NR1D2     | nuclear receptor subfamily 1, group D, member 2                           |
| -3.19 | 997   | 312   | AI524125  | 219737_s_at  | PCDH9     | protocadherin 9                                                           |
| -3.36 | 209   | 62    | BC005894  | 211726_s_at  | FMO2      | flavin containing monooxygenase 2 /// flavin containing monooxygenase 2   |
| -3.57 | 504   | 141   | AL136944  | 223044_at    | SLC40A1   | solute carrier family 40 (iron-regulated transporter), member 1           |
| -3.64 | 656   | 180   | AW207243  | 238617_at    | ---       | CDNA FLJ38181 fis, clone FCBBF1000125                                     |
| -4.02 | 297   | 74    | R49295    | 238919_at    | PCDH9     | Protocadherin 9                                                           |
| -4.16 | 312   | 75    | AI345957  | 226930_at    | FNDC1     | fibronectin type III domain containing 1                                  |
| -4.24 | 241   | 57    | AL359601  | 231930_at    | ELMOD1    | ELMO/CED-12 domain containing 1                                           |
| -4.48 | 821   | 183   | BE857425  | 221530_s_at  | BHLHB3    | basic helix-loop-helix domain containing, class B, 3                      |
| -5.34 | 862   | 161   | NM_001078 | 203868_s_at  | VCAM1     | vascular cell adhesion molecule 1                                         |

|       |       |     |           |             |          |                                              |
|-------|-------|-----|-----------|-------------|----------|----------------------------------------------|
| -5.38 | 236   | 44  | NM_014057 | 218730_s_at | OGN      | osteoglycin (osteoinductive factor, mimecan) |
| -5.50 | 693   | 126 | AF348078  | 223939_at   | SUCNR1   | succinate receptor 1                         |
| -5.93 | 1,020 | 172 | X07868    | 202409_at   | C11orf43 | chromosome 11 open reading frame 43          |
| -5.93 | 496   | 84  | AV700059  | 222722_at   | OGN      | osteoglycin (osteoinductive factor, mimecan) |
| -6.08 | 150   | 25  | AI765819  | 205907_s_at | OMD      | osteomodulin                                 |

---
